# Supplementary material
Source: PubMed Central journal article supplement (PMC3785758)
Supplement: 1307472110_pnas.201307472SI.pdf [file 1307472110_pnas.201307472SI.pdf]

# Supporting Information

Yan et al. 10.1073/pnas.1307472110

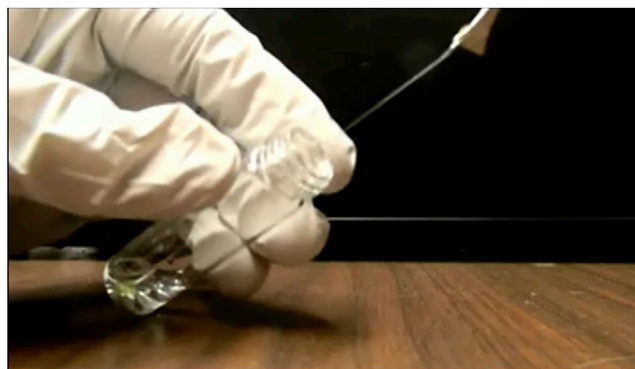

**Movie S1.** Formation of a flexible fiber mechanically drawn from a swelled dichloromethane solution of hexagon 3.

[Movie S1](#)
